# Supplementary material for: Tumor-immune ecosystem dynamics define an individual Radiation Immune Score to predict pan-cancer radiocurability
Source: PubMed Central journal article supplement — Neoplasia. 2021 Oct 5;23(11):1110–22. doi: 10.1016/j.neo.2021.09.003 (PMC8502777; doi:10.1016/j.neo.2021.09.003), 2021-10-05
Supplement: mmc1.pdf [file mmc1.pdf]

**Supplementary Table 1.** Model parameters.

| Parameter              | Meaning                                              | Value                 | Unit              | Ref.  |
|------------------------|------------------------------------------------------|-----------------------|-------------------|-------|
| $\Delta t$             | simulation time step                                 | 1                     | h                 |       |
| $p_p$                  | cancer cell proliferation probability                | $2.31 \times 10^{-2}$ | $\text{h}^{-1}$   | [1]   |
| $p_a$                  | cancer apoptosis rate                                | $4.17 \times 10^{-3}$ | $\text{h}^{-1}$   | [2]   |
| $p_m$                  | cancer motility rate                                 | $4.17 \times 10^{-1}$ | $\text{h}^{-1}$   | [3]   |
| $h_r$                  | immune cell motility probability                     | 0.37                  | $\text{min}^{-1}$ | [4-6] |
| $p_E$                  | probability of cancer cell kill by effector cell     | 0.03                  | $\text{h}^{-1}$   |       |
| $p_R$                  | probability of effector cell kill by suppressor cell | 0.01                  | $\text{h}^{-1}$   |       |
| $\alpha_C$             | cancer cell radiosensitivity                         | 0.3                   | $\text{Gy}^{-1}$  | [7]   |
| $\beta_C$              | cancer cell radiosensitivity                         | 0.03                  | $\text{Gy}^{-2}$  | [7]   |
| $\xi$                  | quiescence radioresistance                           | 1/3                   |                   | [8]   |
| $SF_E(1.8 \text{ Gy})$ | effector cell radiosurvival                          | 0.63                  |                   | [9]   |
| $SF_E(2.0 \text{ Gy})$ | effector cell radiosurvival                          | 0.61                  |                   | [9]   |
| $SF_S(1.8 \text{ Gy})$ | suppressor cell radiosurvival                        | 0.81                  |                   | [9]   |
| $SF_S(2.0 \text{ Gy})$ | suppressor cell radiosurvival                        | 0.79                  |                   | [9]   |
| $\delta_E$             | radiation-induced effector cell recruitment          | 0.05                  | $\text{h}^{-1}$   |       |
| $\delta_E$             | radiation-induced suppressor cell recruitment        | 0.01                  | $\text{h}^{-1}$   |       |
| $\gamma$               | decay of radiation-induced immune stimulation        | 0.05                  | $\text{h}^{-1}$   |       |

**Supplementary Table 2.** Nomenclature of immune cell type abbreviations

| <b>Abbreviation</b>                | <b>Tumor-Infiltrating Leukocytes</b> |
|------------------------------------|--------------------------------------|
| <b>CD8 T</b>                       | CD8+ T cell                          |
| <b>DC-</b>                         | Resting Dendritic cell               |
| <b>DC+</b>                         | Activated Dendritic cell             |
| <b>Eos</b>                         | Eosinophil                           |
| <b>M0</b>                          | Non-polarized Macrophage             |
| <b>M1</b>                          | M1-polarized Macrophage              |
| <b>M2</b>                          | M2-polarized Macrophage              |
| <b>MC-</b>                         | Resting Mast cell                    |
| <b>MC+</b>                         | Activated Mast cell                  |
| <b>Mem B</b>                       | Memory B cell                        |
| <b>Mem CD4 T-</b>                  | Resting CD4+ Memory T cell           |
| <b>Mem CD4 T+</b>                  | Activated CD4+ Memory T cell         |
| <b>Mono</b>                        | Monocyte                             |
| <b>Naïve B</b>                     | Naïve B cell                         |
| <b>Naïve CD4 T</b>                 | Naïve CD4+ T cell                    |
| <b>NK-</b>                         | Resting Natural Killer cell          |
| <b>NK+</b>                         | Activated Natural Killer cell        |
| <b>PC</b>                          | Plasma cell                          |
| <b>PMN</b>                         | Neutrophil                           |
| <b>Tfh</b>                         | T cell follicular helper cell        |
| <b>Treg</b>                        | T regulatory cell                    |
| <b><math>\gamma\delta</math> T</b> | Gamma-delta T cell                   |

**Supplementary Table 3.** Nomenclature of tumor type abbreviations

| Abbreviation    | Tumor Type               |
|-----------------|--------------------------|
| <b>BC_BASAL</b> | PAM50 Basal              |
| <b>BC_HER2</b>  | PAM50 Her2               |
| <b>BC_LUMA</b>  | PAM50 LumA               |
| <b>BC_LUMB</b>  | PAM50 LumB               |
| <b>BC_NORM</b>  | PAM50 Normal             |
| <b>BLCA</b>     | Bladder                  |
| <b>CESC</b>     | Cervix                   |
| <b>COLON</b>    | Large Bowel              |
| <b>ESCA</b>     | Esophagus                |
| <b>HGG</b>      | High-grade glioma        |
| <b>HNSC</b>     | Head - Neck              |
| <b>KIR</b>      | Kidney                   |
| <b>KIR_PEL</b>  | Renal Pelvis             |
| <b>LGG</b>      | Low-grade glioma         |
| <b>LIVC</b>     | Liver                    |
| <b>LU_NOS</b>   | Lung NOS                 |
| <b>LUAD</b>     | Lung adenocarcinoma      |
| <b>LUSC</b>     | Lung squamous cell       |
| <b>MELA</b>     | Melanoma                 |
| <b>NE</b>       | Neuroendocrine           |
| <b>NE_LUNG</b>  | Neuroendocrine Lung      |
| <b>NE_PANC</b>  | Neuroendocrine Pancreas  |
| <b>NMSC</b>     | Non-melanoma skin cancer |
| <b>OVCA</b>     | Ovary                    |
| <b>PANC</b>     | Pancreas                 |
| <b>PRAD</b>     | Prostate                 |
| <b>READ_AN</b>  | Rectum-Anus              |
| <b>SARC</b>     | Sarcoma                  |
| <b>STAD</b>     | Stomach                  |
| <b>THCA</b>     | Thyroid                  |
| <b>UCEC</b>     | Endometrium/Uterus       |

## Supplementary Figures

**Figure S1. TIES for 31 tumor types.** Mapping of TIES composition for each of the 31 tumor types, highlighting that all clinically observed tumors have an immune-evasion phenotype.

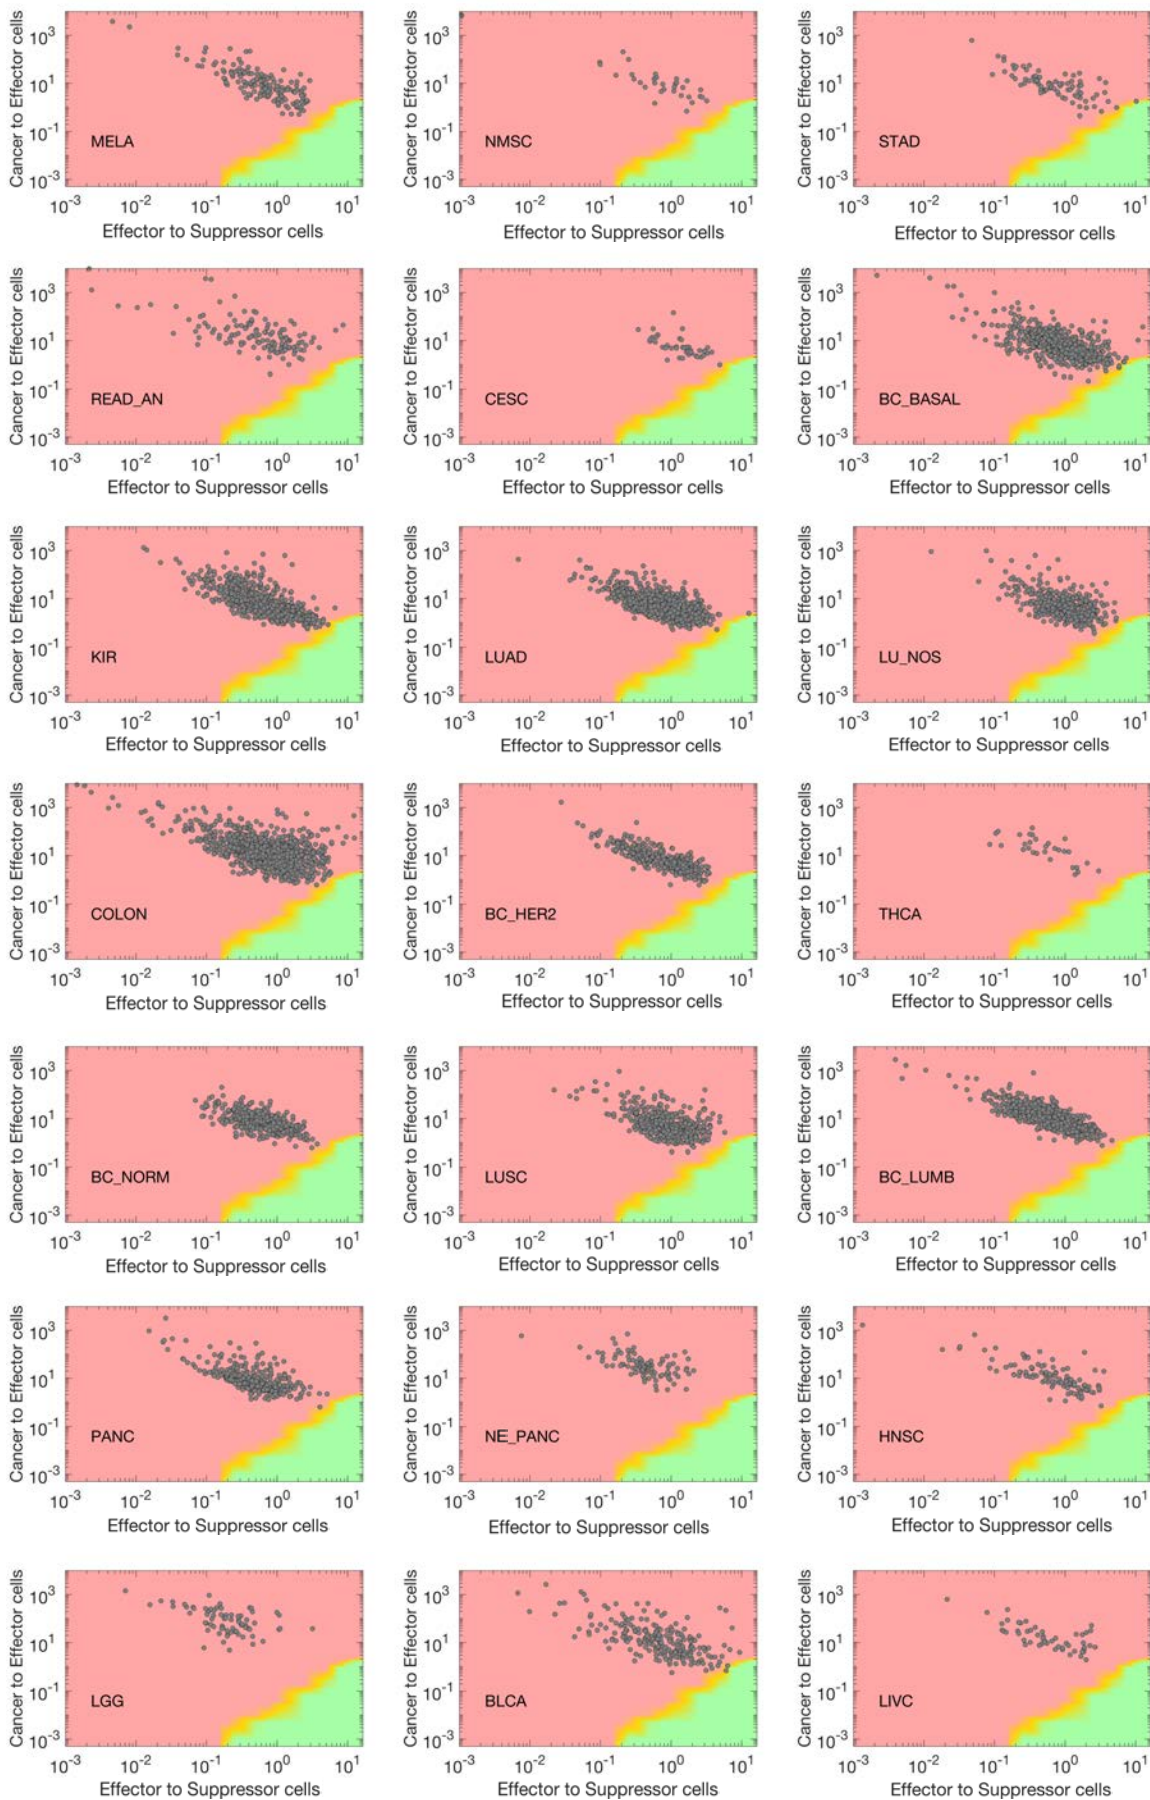

**Supplementary Figure 1**

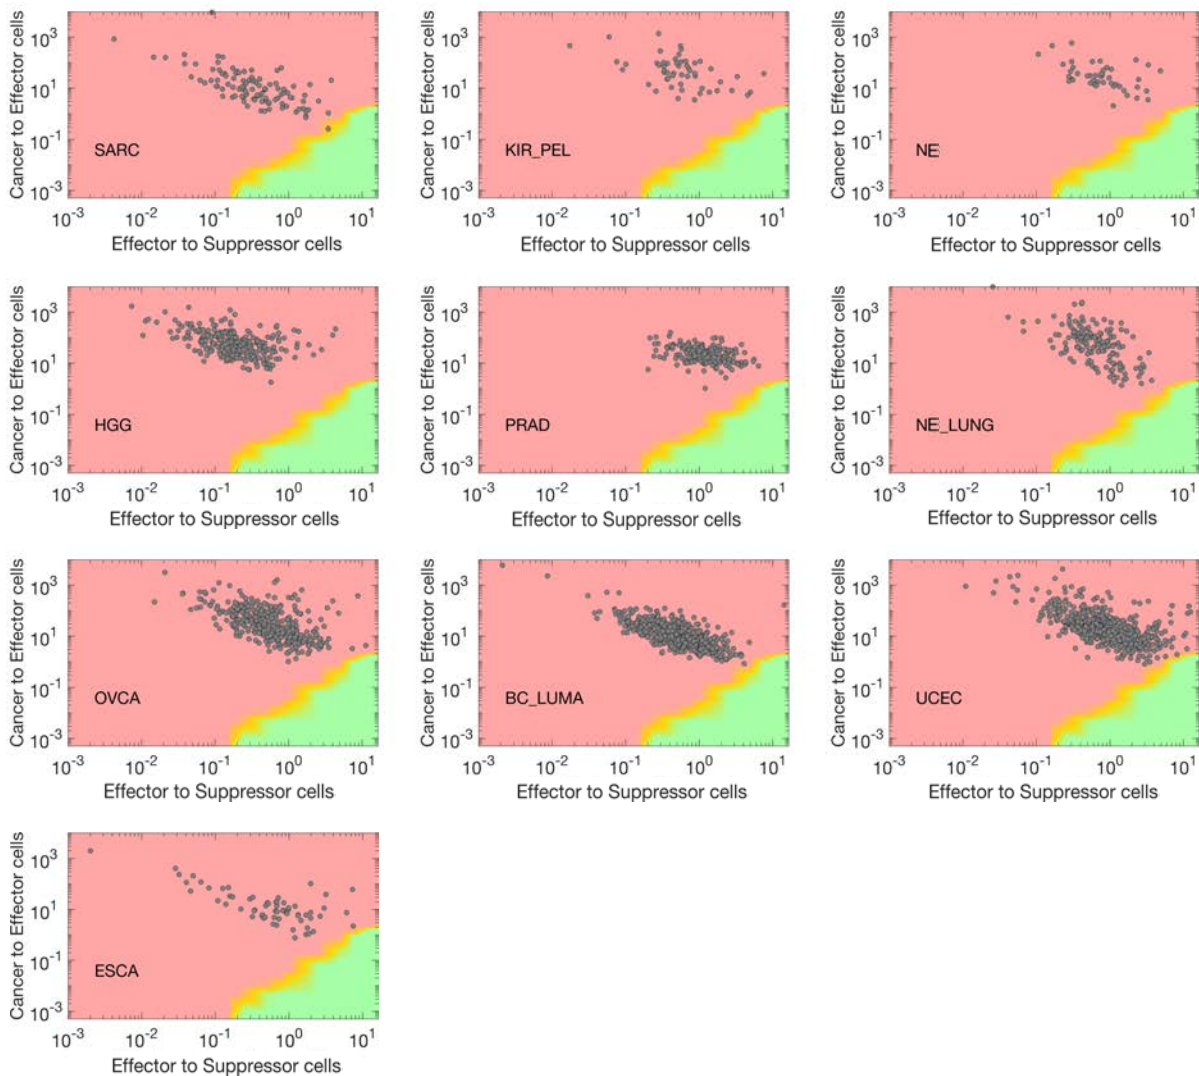

**Figure S2. Comparison of iRIS among PAM50 breast subtypes.** Boxplots demonstrating distribution of iRIS among PAM50 molecular breast subtypes. Significant differences within subtypes are noted. Kruskal-Wallis test was used to compare groups.

Subtype LumA LumB Normal Basal Her2

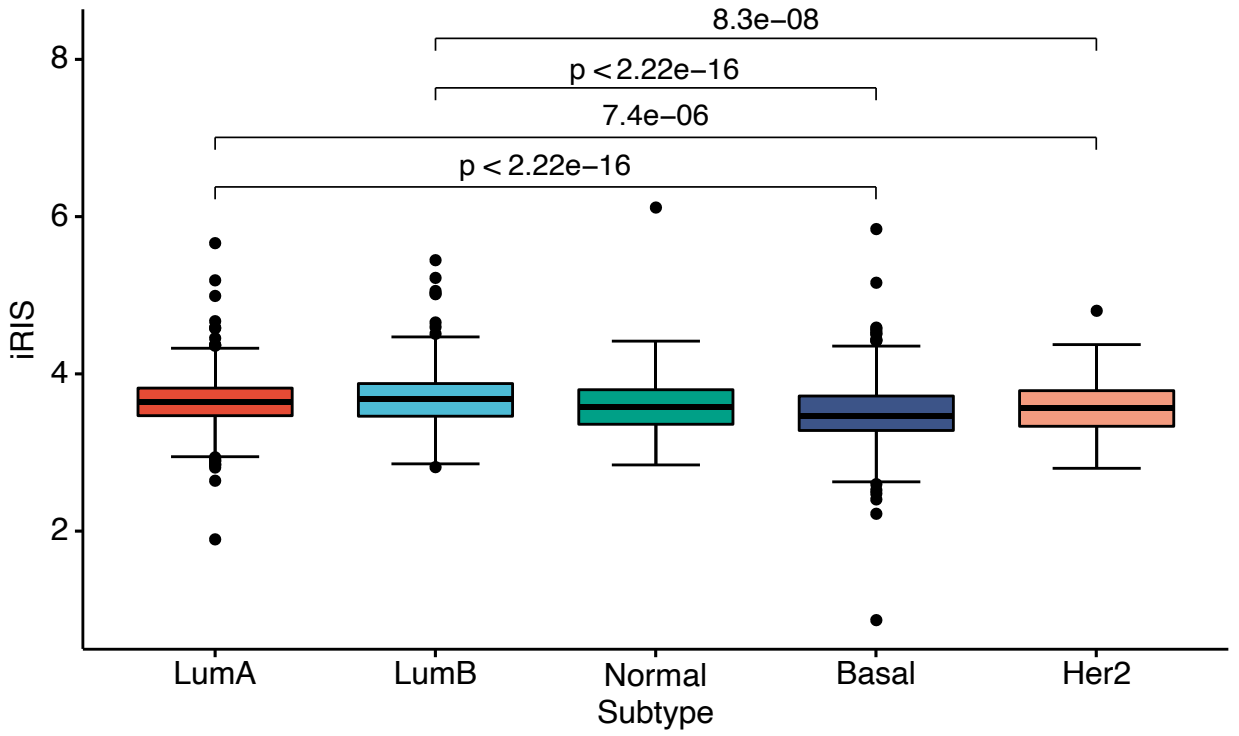



## References

- [1] Tubiana, Maurice. "Tumor cell proliferation kinetics and tumor growth rate." *Acta Oncologica* 28.1 (1989): 113-121.
- [2] Chaplain, Mark AJ, Luigi Graziano, and Luigi Preziosi. "Mathematical modelling of the loss of tissue compression responsiveness and its role in solid tumour development." *Mathematical medicine and biology: a journal of the IMA* 23.3 (2006): 197-229.
- [3] Morton, C. I., Hlatky, L., Hahnfeldt, P., & Enderling, H. (2011). Non-stem cancer cell kinetics modulate solid tumor progression. *Theoretical Biology and Medical Modelling*, 8(1), 48.
- [4] M. J. Miller, S. H. Wei, I. Parker, and M. D. Cahalan. Two-photon imaging of lymphocyte motility and antigen response in intact lymph node. *Science* 296(5574): 1869–73, 2002.
- [5] S. N. Mueller. Effector T-cell responses in non-lymphoid tissues: insights from in vivo imaging. *Immunology and Cell Biology* 91(4): 290–6, 2013.
- [6] D. Masopust and J. M. Schenkel. The integration of T cell migration, differentiation and function. *Nature Reviews Immunology* 13(5): 309, 2013.
- [7] H. Enderling, D. Park, L. Hlatky, and P. Hahnfeldt. The importance of spatial distribution of stemness and proliferation state in determining tumor radioresponse. *Mathematical Modelling of Natural Phenomena* 4(3): 117–33, 2009.
- [8] S. Rockwell, I. T. Dobrucki, E. Y. Kim, et al. Hypoxia and radiation therapy: Past history, ongoing research, and future promise. *Curr Mol Med* 9:442-58, 2009.
- [9] K. Schnarr, I. Dayes, J. Sathya, and D. Boreham. Individual radiosensitivity and its relevance to health physics. *Dose-Response* 5(4):333-48, 2007.
